# Supplementary material for: Spray printing of self-assembled porous structures for high power battery electrodes
Source: Royal Society of Chemistry journal article supplement (doi:10.1039/c8ta02920b), 2018-01-01
Supplement: c8ta02920b1.pdf [file c8ta02920b1.pdf]

## Electronic Supplementary Information

# Spray Printing of Self-Assembled Porous Structures for High Power Battery Electrodes

Sang Ho Lee\*, Amoghavarsha Mahadevegowda, Chun Huang, Jack D. Evans and

Patrick S. Grant

Department of Materials, University of Oxford, Oxford OX1 3PH, UK.

---

\* Address correspondence to [sangho.lee@materials.ox.ac.uk](mailto:sangho.lee@materials.ox.ac.uk)

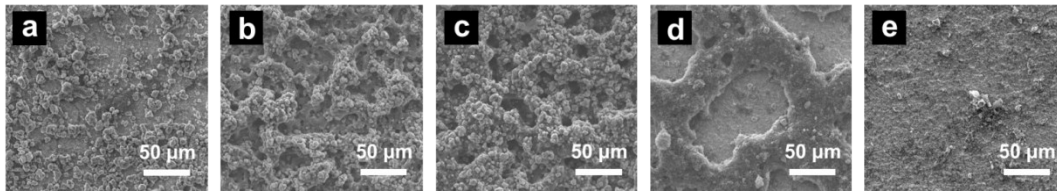

**Fig.S1** A series of SEM images of the morphology change of the sprayed electrodes according to a change in the volume ratio of DI water to IPA in the liquid spray suspension: (a) 100:0, (b) 70:30, (c) 50:50, (d) 30:70 and (e) 0:100.

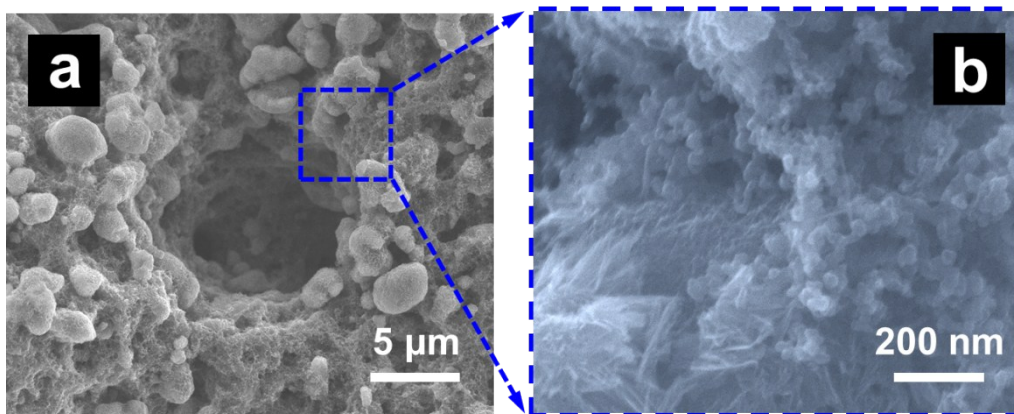

**Fig.S2** (a) SEM image of the pore structure of the TiO<sub>2</sub>(B)-based electrode. (b) A magnified view around the pore region.

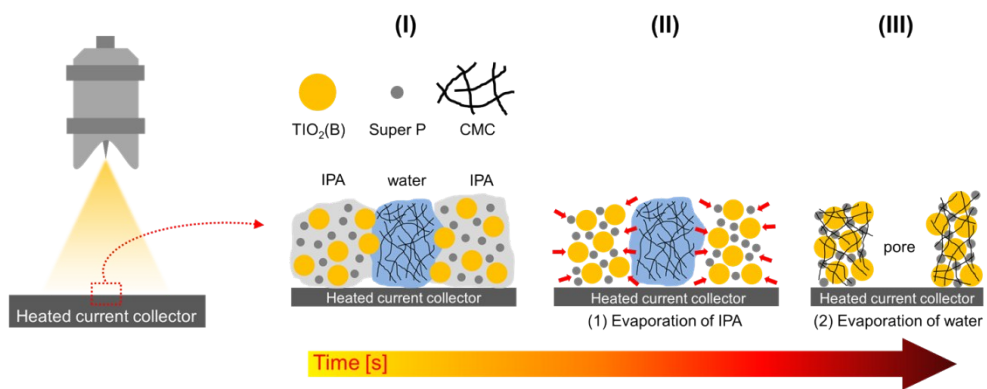

**Fig.S3** Schematic diagram of a proposed, simple model of how to fabricate through-thickness pore channels in a battery electrode based on layer-by-layer spray printing and bi-solvent drying.

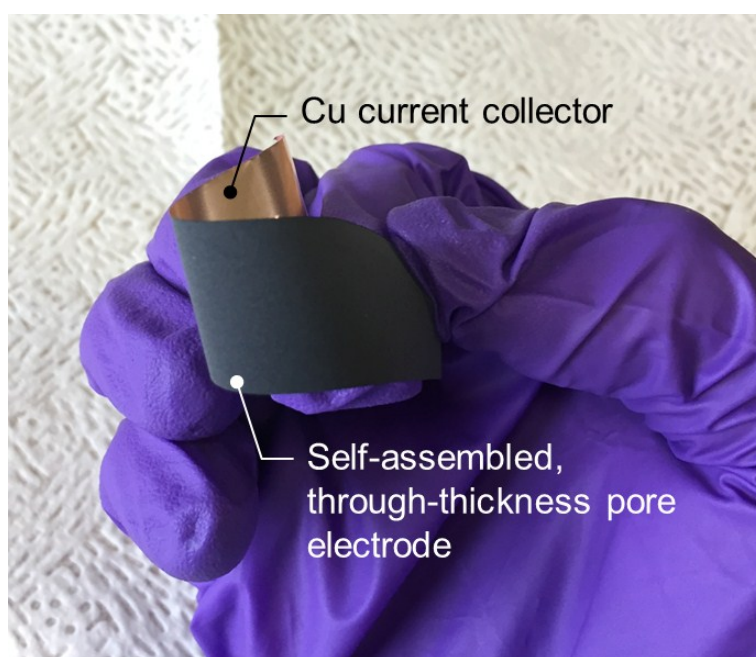

**Fig.S4** A photograph of an as-spray printed, through-thickness pore electrode robustly withstanding severe bending and flexing by hand.

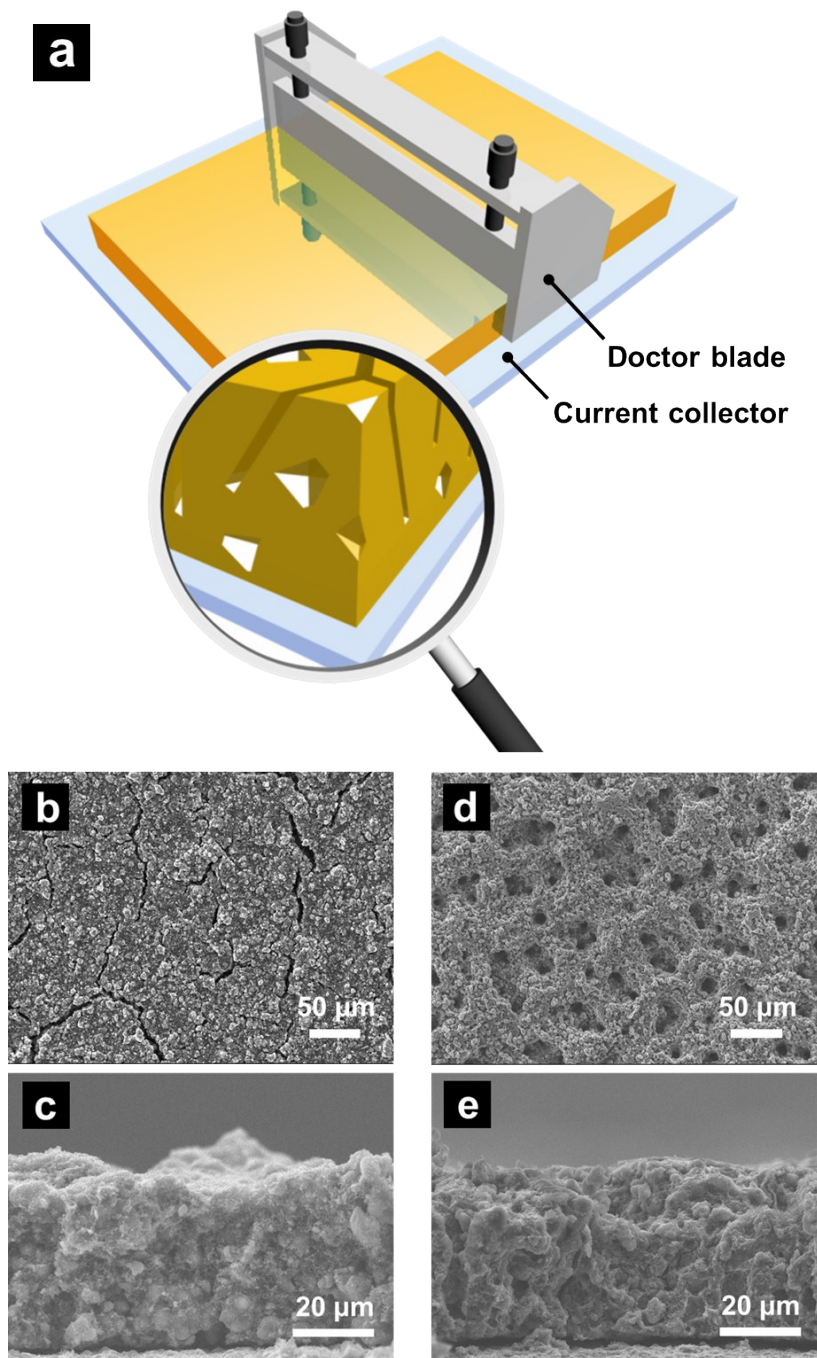

**Fig.S5** (a) Schematic diagram of the conventional slurry casting process using a doctor blade. (b) Plan view and (c) cross-sectional view of the slurry cast  $\text{TiO}_2(\text{B})$ -NT-based electrodes. (d) Plan view and (e) cross-sectional view of the spray printed  $\text{TiO}_2(\text{B})$ -NT-based electrodes.

**Table S1** Summary of the electrode mass loading according to a change in electrode thickness.

| Thickness<br>( $\mu\text{m}$ ) | Sprayed<br>( $\text{mg}/\text{cm}^2$ ) | Slurry-cast<br>( $\text{mg}/\text{cm}^2$ ) |
|--------------------------------|----------------------------------------|--------------------------------------------|
| 10                             | $0.53 \pm 0.02$                        | $0.68 \pm 0.03$                            |
| 20                             | $0.98 \pm 0.03$                        | $1.38 \pm 0.04$                            |
| 40                             | $2.01 \pm 0.02$                        | $2.65 \pm 0.05$                            |
| 80                             | $3.99 \pm 0.04$                        | $5.53 \pm 0.06$                            |

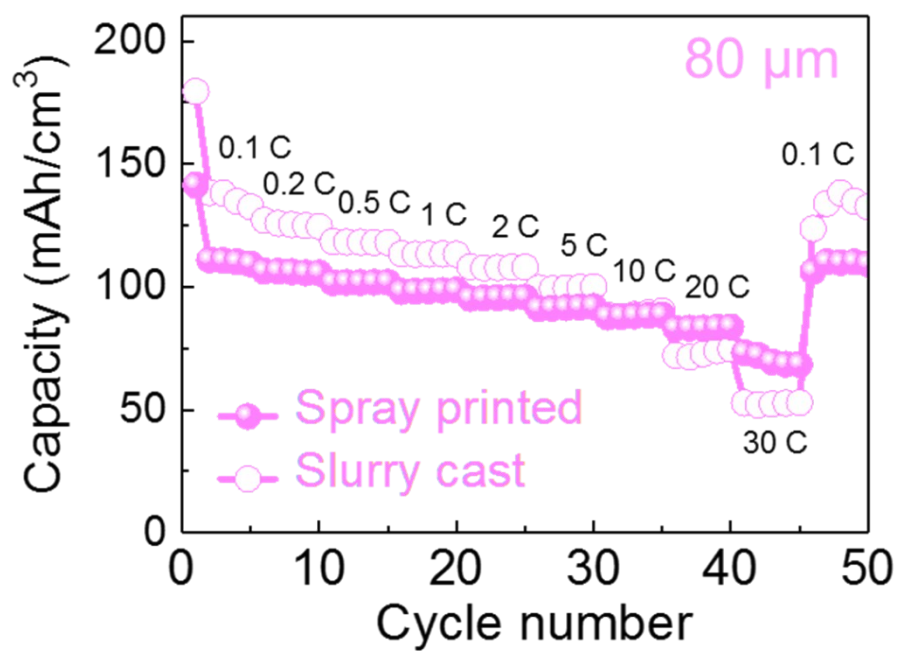

**Fig.S6** Volumetric discharge capacities of 80 μm thick spray printed and slurry cast electrodes at various C-rates in the potential range of 1.0 to 3.0 V (vs. Li/Li<sup>+</sup>).



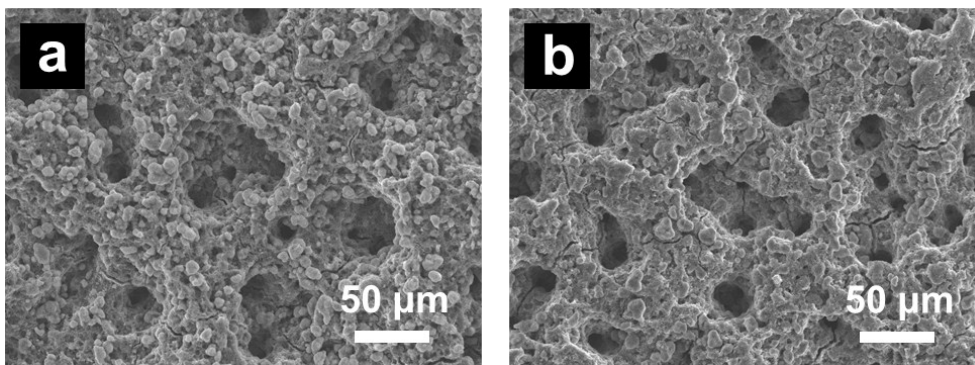

**Fig.S7** SEM images of the 80  $\mu\text{m}$  thick  $\text{TiO}_2(\text{B})$ -NT-based electrodes (a) before and (b) after 200 cycles in the potential range of 1.0 to 3.0 V (vs.  $\text{Li}/\text{Li}^+$ ) at 1 C.

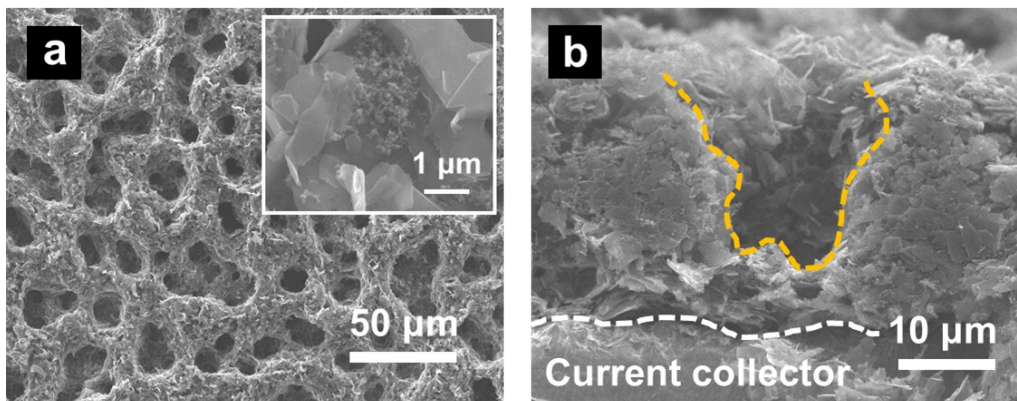

**Fig.S8** (a) Plan view and (b) cross-sectional SEM images of through-thickness porous electrodes, manufactured by spray printing of graphene bi-solvent suspensions, where graphene flakes of  $\sim 5\text{-}7\ \mu\text{m}$  diameter were exploited.
